# Supplementary material for: Nonlinear Optical Properties of Zn(II) Porphyrin, Graphene Nanoplates, and Ferrocene Hybrid Materials
Source: MDPI journal article supplement (doi:10.3390/ma16155427), 2023-08-02
Supplement: s1 [file s1]

# Nonlinear Optical Properties of Zn(II) Porphyrin, Graphene Nanoplates, and Ferrocene Hybrid Materials

**Francesca Limosani <sup>1</sup>, Francesca Tessore <sup>2,\*</sup>, Alessandra Forni <sup>3</sup>, Angelo Lembo <sup>1</sup>, Gabriele Di Carlo <sup>2</sup>, Cecilia Albanese <sup>2</sup>, Stefano Bellucci <sup>4</sup> and Pietro Tagliatesta <sup>1</sup>**

<sup>1</sup> Department of Chemical Science and Technologies, University of Rome "Tor Vergata", Via della Ricerca Scientifica 1, 00133 Rome, Italy; francesca.limosani@uniroma2.it (F.L.); angelo.lembo@uniroma2.it (A.L.); pietro.tagliatesta@uniroma2.it (P.T.)

<sup>2</sup> Department of Chemistry, University of Milan, Via C. Golgi 19, 20133 Milan, Italy; francesca.tessore@unimi.it (F.T.); gabriele.dicarlo@unimi.it (G.D.C.); cecilia.albanese@unimi.it (C.A.)

<sup>3</sup> CNR-SCITEC, Istituto di Scienze e Tecnologie Chimiche "G. Natta", Via Golgi 19, 20133 Milan, Italy; alessandra.forni@scitec.cnr.it

<sup>4</sup> INFN-National Laboratories of Frascati Via Enrico Fermi 54, 00044 Frascati, Italy; bellucci@lnf.infn.it

\* Correspondence: francesca.tessore@unimi.it; Tel.: +39-0250314398

## Table of Contents

|                                                                                                                                                                         |    |
|-------------------------------------------------------------------------------------------------------------------------------------------------------------------------|----|
| Chemical Structures .....                                                                                                                                               | 3  |
| Experimental.....                                                                                                                                                       | 4  |
| Mass spectrometry and <sup>1</sup> H-NMR spectroscopy.....                                                                                                              | 5  |
| FAB spectrum of P-CHO .....                                                                                                                                             | 5  |
| <sup>1</sup> H-NMR spectrum of P-CHO .....                                                                                                                              | 5  |
| Elemental Analysis .....                                                                                                                                                | 6  |
| C <sub>37</sub> H <sub>22</sub> N <sub>4</sub> O calc.: C, 82.51; H, 4.12; N, 10.40; O, 2.97 // found: C, 82.48; H, 4.13; N, 10.43; O, 2.96..                           | 6  |
| <sup>1</sup> H-NMR spectrum of ZnP-CHO.....                                                                                                                             | 6  |
| Elemental Analysis .....                                                                                                                                                | 6  |
| C <sub>37</sub> H <sub>20</sub> N <sub>4</sub> OZn calc.: C, 73.82; H, 3.35; N, 9.31; O, 2.66; Zn, 10.86 // found: C, 73.89; H, 3.34; N, 9.28; O, 2.67; Zn, 10.82. .... | 6  |
| FAB spectrum of Br-P-CHO .....                                                                                                                                          | 7  |
| <sup>1</sup> H-NMR spectrum of Br-P-CHO.....                                                                                                                            | 7  |
| Elemental Analysis .....                                                                                                                                                | 7  |
| C <sub>37</sub> H <sub>21</sub> BrN <sub>4</sub> O calc.: C, 71.97; H, 3.43; Br, 12.94; N, 9.07; O, 2.59 // found: C, 71.86; H, 3.44; Br, 12.99; N, 9.11; O, 2.60.....  | 7  |
| MALDI spectrum of Fc-P-CHO.....                                                                                                                                         | 8  |
| <sup>1</sup> H-NMR spectrum of Fc-P-CHO.....                                                                                                                            | 8  |
| Elemental Analysis .....                                                                                                                                                | 8  |
| FAB spectrum of Fc-ZnP-CHO.....                                                                                                                                         | 9  |
| <sup>1</sup> H-NMR spectrum of Fc-ZnP-CHO .....                                                                                                                         | 9  |
| Elemental Analysis .....                                                                                                                                                | 9  |
| X-Ray Photoelectron spectroscopy .....                                                                                                                                  | 10 |
| Compound ZnP-GNP.....                                                                                                                                                   | 10 |
| Compound Fc-ZnP-GNP .....                                                                                                                                               | 11 |
| Raman spectroscopy.....                                                                                                                                                 | 12 |
| Compound Fc-ZnP-GNP .....                                                                                                                                               | 12 |
| UV-Vis spectroscopy .....                                                                                                                                               | 12 |
| DFT theoretical calculations.....                                                                                                                                       | 14 |

## Chemical Structures

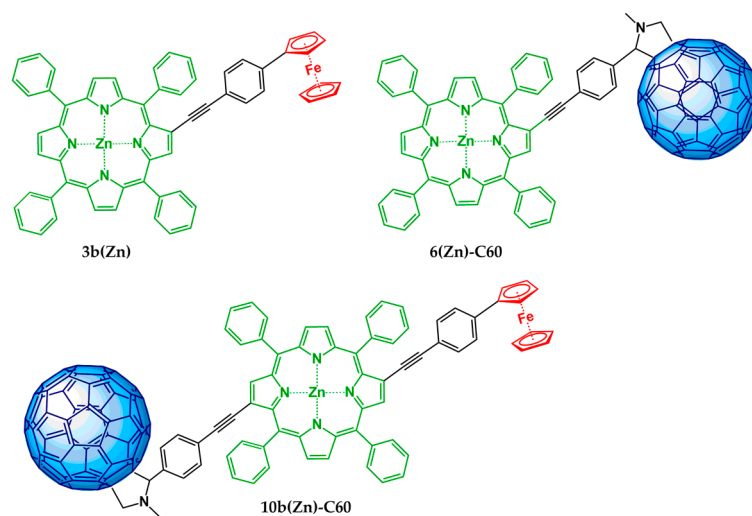

**Figure S1.** Dyads and triads already investigated by some of us

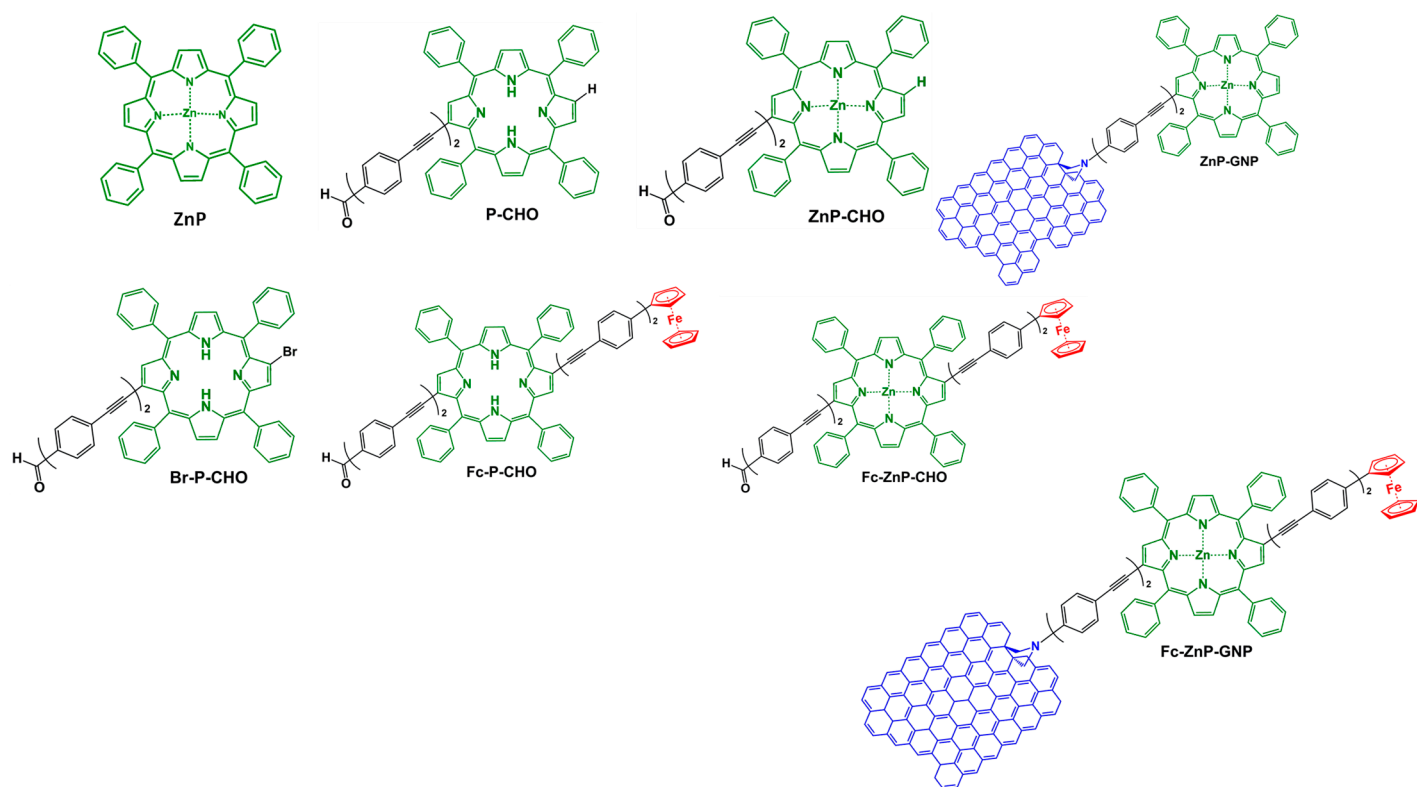

**Figure S2.** Synopsis of chemical structures

## Experimental

**General Methods.**  $^1\text{H}$ -NMR spectra were recorded as  $\text{CDCl}_3$  and  $\text{C}_6\text{D}_6$  solutions on a Bruker AM-300 instrument using residual solvent signal as an internal standard. Chemical shifts are given as  $\delta$  values. FAB mass spectra were measured on a VG-4 spectrometer using m-nitrobenzyl alcohol (NBA) as a matrix. Matrix-assisted laser desorption/ionization time of flight (MALDI-TOF) mass spectra were performed with a MALDI-TOF Reflex IV instrument (Bruker-Daltonics) in reflector mode, using a 337 nm nitrogen laser (8 Hz). A 2 mg/mL 2,5-dihydroxybenzoic acid (gentisic acid) solution in  $\text{CH}_3\text{CN}$ /TFA (0.1% solution) was used as a matrix. Electronic absorption spectra were recorded in  $\text{CH}_2\text{Cl}_2$  solution at room temperature on a Shimadzu UV 3600 spectrophotometer (Shimadzu Corporation, Kyoto, Japan).

Raman spectra were obtained by using a confocal Raman microscope Invia Renishaw, endowed with a 633 nm laser, a RenCam CCD detector, 1024x256 pixels (200-1060 nm), an encoded xyz stage (replacement precision: 100nm), using an 1800 l/mm grating.

XPS measurements were obtained from a modified Omicron NanoTechnology MXPS system. The spectra were excited by achromatic Mg K $\alpha$  and Al K $\alpha$  photons ( $h\nu = 1253.6$  and 1486.6 eV, respectively), generated operating the anode at 14-15 kV, 10-20 mA. All the samples were mounted on metal tips as thin layers of pressed powders. Experimental spectra were theoretically reconstructed by fitting the peaks to symmetric pseudo-Voigt functions (linear combination of gaussian and lorentzian peaks) and the background to a Shirley or a linear function. XPS atomic ratios ( $\pm 10\%$  associated error) between relevant core lines were estimated from experimentally determined area ratios corrected for the corresponding theoretical cross sections and for a square root dependence of the photoelectron's kinetic energies. All binding energies were referenced to the lowest lying C 1s peak component, taken at 285.0 eV, which was assumed to be related to the aromatic C atoms

Elemental analyses were carried out with a PerkinElmer CHN 2400 instrument in the Analytical Laboratories of the Department of Chemistry at the University of Milan.

## Mass spectrometry and $^1\text{H}$ -NMR spectroscopy

### FAB spectrum of P-CHO

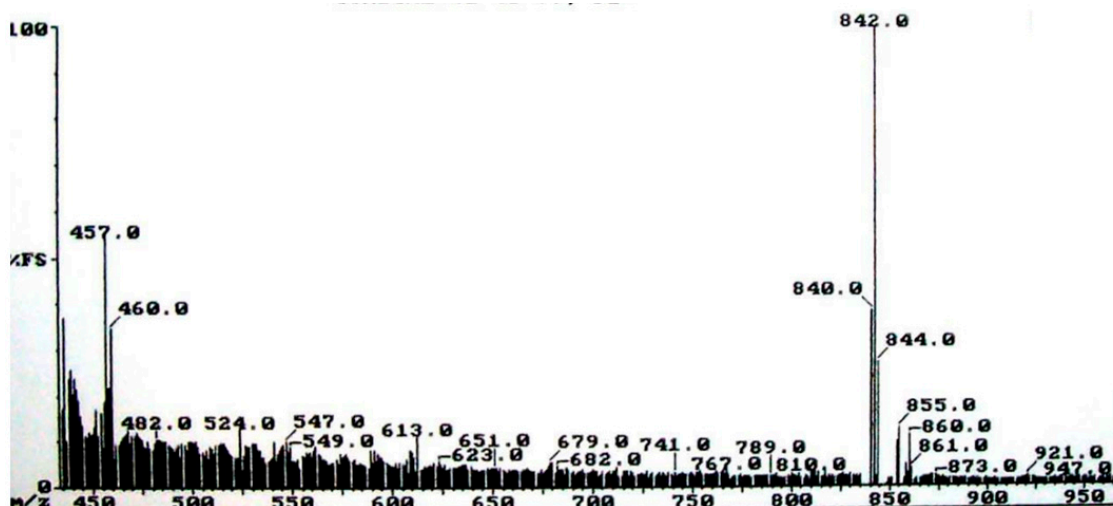

Figure S3. FAB spectrum of compound P-CHO using as matrix NBA

### $^1\text{H}$ -NMR spectrum of P-CHO

$^1\text{H}$ -NMR (300 MHz,  $\text{CDCl}_3$ ):  $\delta$  (ppm) 10.06 (s, 1H), 9.10 (s, 1H), 8.90 (s, 2H), 8.85 (d, 3J ) 5.9 Hz, 1H), 8.79 (s, 2H), 8.77 (d, 3J ) 5.9 Hz, 1H), 8.23 (br m, 5H), 7.91 (d, 3J ) 7.8 Hz, 2H), 7.80-7.66 (br m, 17H), 7.54 (d, 3J ) 7.8 Hz, 2H), 7.38 (d, 2H; J ) 7.8), -2.65 (s, 2H).

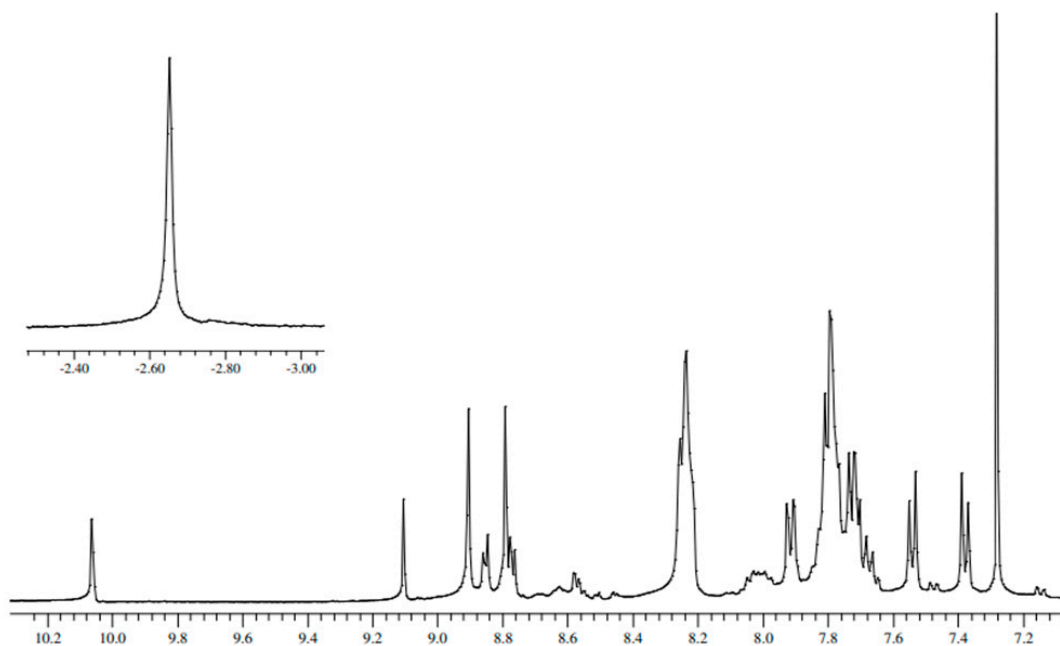

Figure S4.  $^1\text{H}$ -NMR in  $\text{CDCl}_3$  of compound P-CHO

### Elemental Analysis

$C_{37}H_{22}N_4O$  *calc.*: C, 82.51; H, 4.12; N, 10.40; O, 2.97 // *found*: C, 82.48; H, 4.13; N, 10.43; O, 2.96.

### $^1H$ -NMR spectrum of ZnP-CHO

$^1H$ -NMR (300 MHz,  $CDCl_3$ ):  $\delta$  (ppm) 10.04 (s, 1H), 9.26 (s, 1H), 8.95 (s, 2H), 8.93 (s, 2H), 8.90 (d, 3J ) 5.3 Hz, 1H), 8.79 (d, 3J ) 5.3 Hz, 1H), 8.23 (br m, 10H), 7.90 (d, 3J ) 7.6 Hz, 2H), 7.78 (b m, 10H), 7.69 (d, 3J ) 6.0 Hz, 2H), 7.55 (d, 3J ) 8.3 Hz, 2H), 7.40 (d, 3J ) 8.3 Hz, 2H).

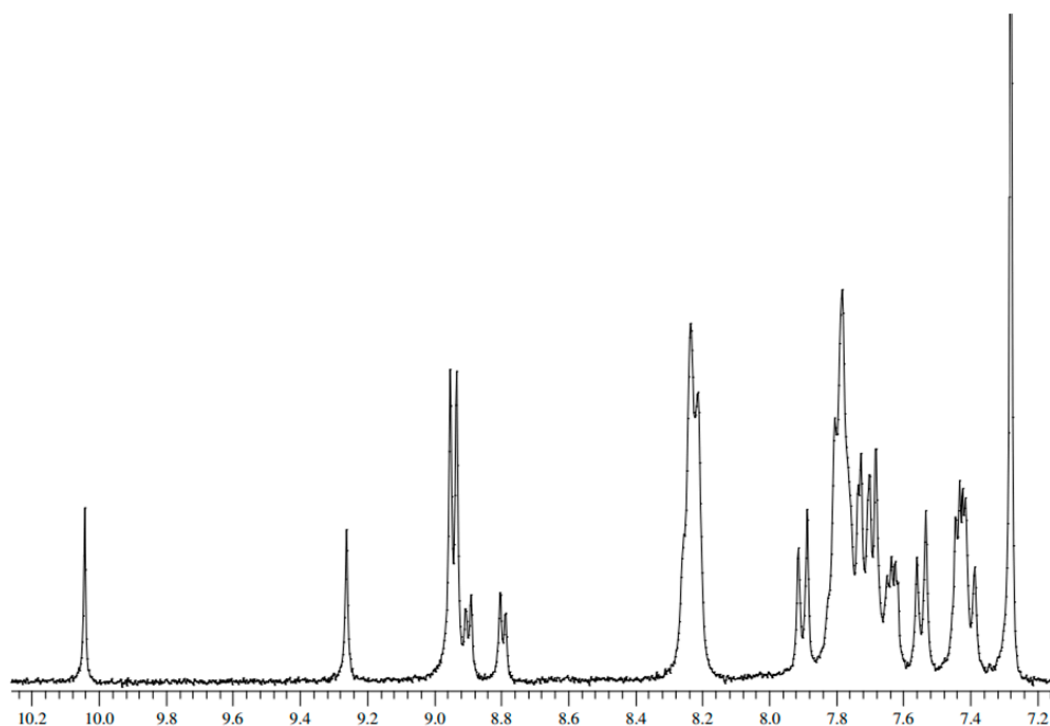

Figure S5.  $^1H$ -NMR in  $CDCl_3$  of compound ZnP-CHO

### Elemental Analysis

$C_{37}H_{20}N_4OZn$  *calc.*: C, 73.82; H, 3.35; N, 9.31; O, 2.66; Zn, 10.86 // *found*: C, 73.89; H, 3.34; N, 9.28; O, 2.67; Zn, 10.82.

### FAB spectrum of Br-P-CHO

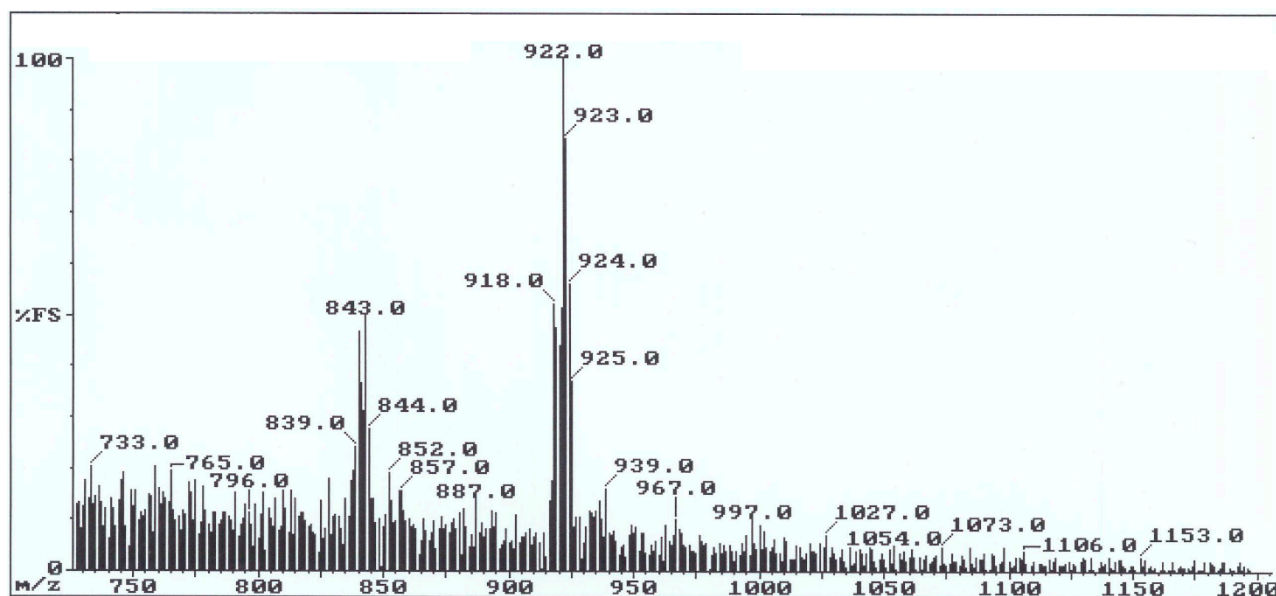

Figure S6. FAB spectrum of compound **Br-P-CHO** using as matrix NBA

### <sup>1</sup>H-NMR spectrum of Br-P-CHO

<sup>1</sup>H-NMR (300 MHz; CDCl<sub>3</sub>): δ(ppm) 10.06 (s, 1H), 9.11 (s, 1H), 8.90-7.60 (br m, several signals difficult to resolve and integrate, 25H), 7.54 (d, 2H, J = 9.1 Hz), 7.48 (d, 2H, J = 7.2 Hz), 7.37 (d, 2H, J = 7.2 Hz), 7.12 (d, 1H, J = 11.1 Hz), -2.65 (s, 2H); UV-vis (Toluene): λ<sub>max</sub> (log ε) 432 (5.3), 526 (4.8), 564 (4.6), 604 (4.5), 662 (4.3)

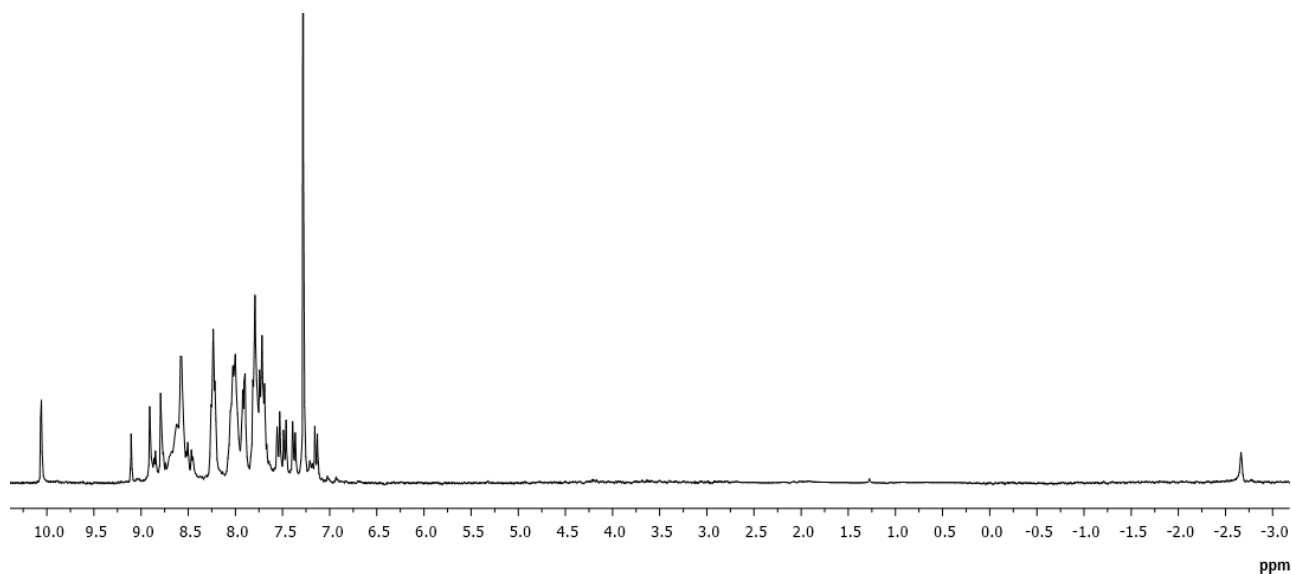

Figure S7. <sup>1</sup>H-NMR in CDCl<sub>3</sub> of compound **Br-P-CHO**

### Elemental Analysis

C<sub>37</sub>H<sub>21</sub>BrN<sub>4</sub>O calc.: C, 71.97; H, 3.43; Br, 12.94; N, 9.07; O, 2.59 // found: C, 71.86; H, 3.44; Br, 12.99; N, 9.11; O, 2.60

### MALDI spectrum of Fc-P-CHO

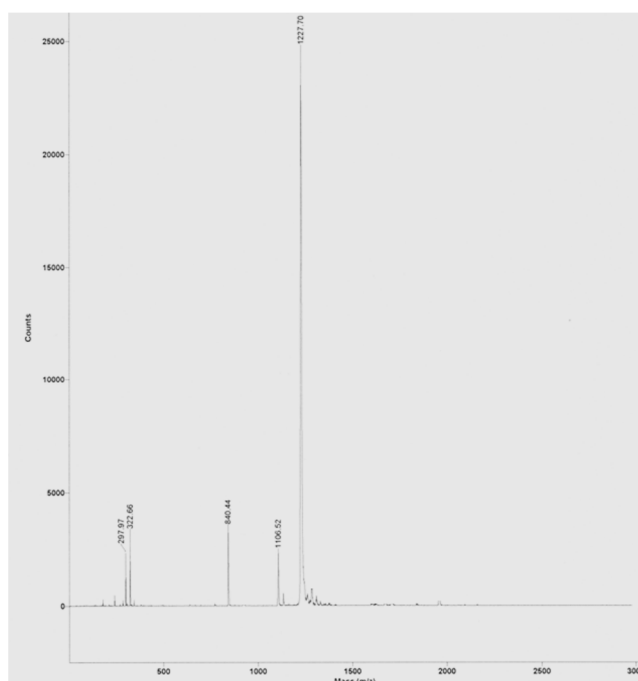

**Figure S8.** MALDI spectrum of compound **Fc-P-CHO** using as matrix gentisic acid

### <sup>1</sup>H-NMR spectrum of Fc-P-CHO

<sup>1</sup>H-NMR (400 MHz, C<sub>6</sub>D<sub>6</sub>): δ (ppm) 9.55 (s, 1H), 9.41 (s, 2H), 8.91-8.65 (m, 5H), 8.16 (s, 4H), 8.05 (s, 5H), 7.62-7.32 (br m, several signals difficult to resolve and integrate, 26H), 4.45 (s, 2H), 4.14 (s, 2H), 3.86 (s, 5H), -2.13 (s, 2H).

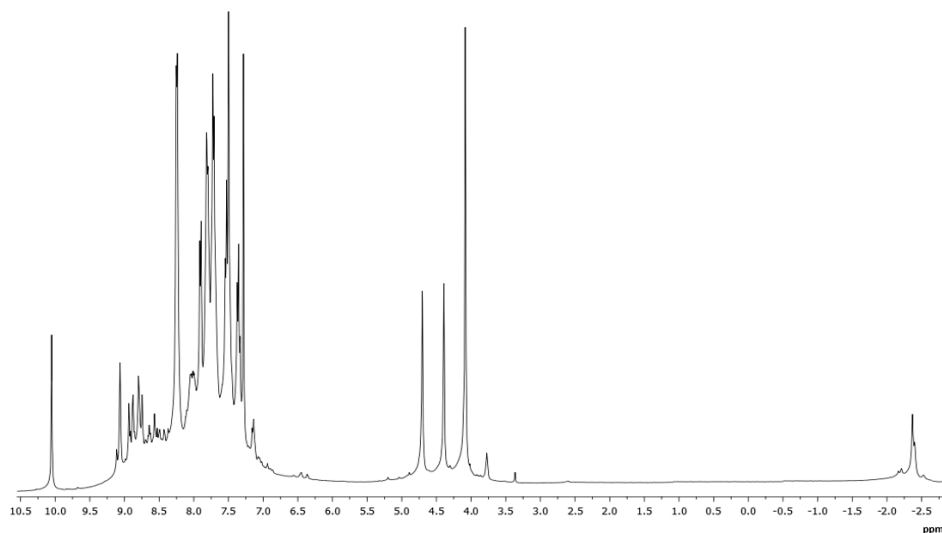

**Figure S9.** <sup>1</sup>H-NMR in CDCl<sub>3</sub> of compound **Fc-P-CHO**

### Elemental Analysis

C<sub>63</sub>H<sub>38</sub>FeN<sub>4</sub>O *calc.*: C, 81.99; H, 4.15; Fe, 6.05; N, 6.07; O, 1.73 // *found*: C, 82.02; H, 4.16; Fe, 6.03; N, 6.05; O, 1.74



### FAB spectrum of Fc-ZnP-CHO

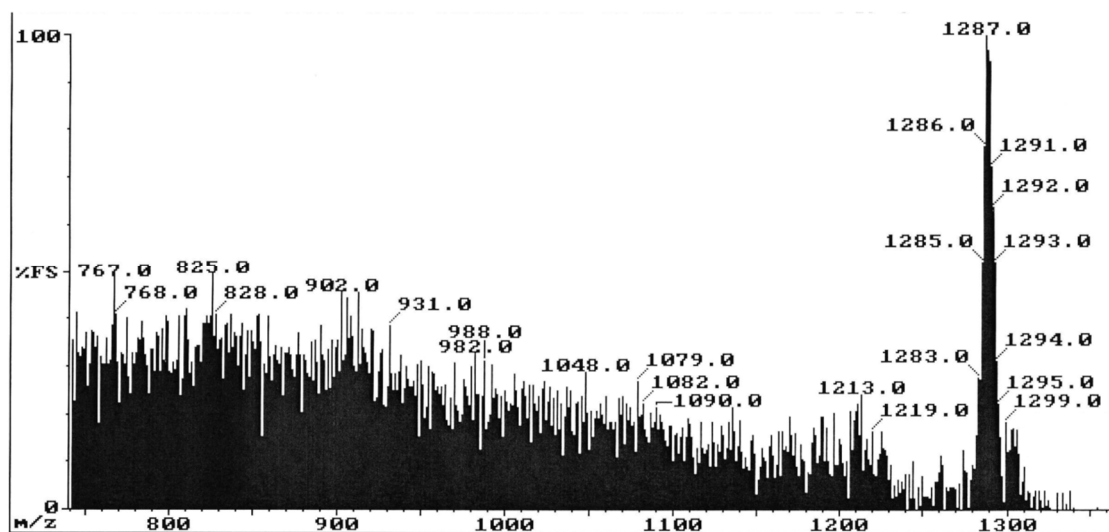

Figure S10. FAB spectrum of compound Fc-ZnP-CHO using as matrix NBA

### $^1\text{H}$ -NMR spectrum of Fc-ZnP-CHO

$^1\text{H}$ -NMR (400 MHz,  $\text{C}_6\text{D}_6$ ):  $\delta$  (ppm) 9.57 (s, 1H), 9.56 (s, 1H), 9.54 (s, 1H), 8.95-8.88 (m, 4H), 8.84 (s, 2H), 8.32-8.26 (m, 6H), 8.24-8.18 (m, 8H), 7.61-7.45 (m, 12H), 7.41-7.30 (m, 8H), 4.47 (s, 2H), 4.14 (s, 2H), 3.91 (s, 5H)

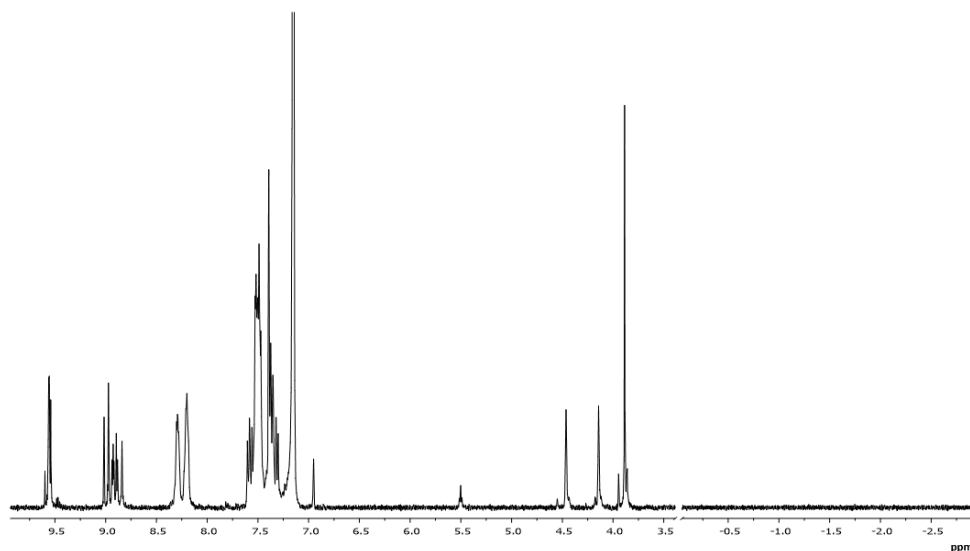

Figure S11.  $^1\text{H}$  NMR in  $\text{C}_6\text{D}_6$  of compound Fc-ZnP-CHO

### Elemental Analysis

$\text{C}_{63}\text{H}_{36}\text{FeN}_4\text{OZn}$  calc.: C, 76.73; H, 3.68; Fe, 5.66; N, 5.68; O, 1.62; Zn, 6.63 // found: C, 76.76; H, 3.67; Fe, 5.64; N, 5.70; O, 1.62; Zn, 6.61

## X-Ray Photoelectron spectroscopy

### Compound ZnP-GNP

In Figures S10a and S10b the N 1s and Zn 2p<sub>3/2,1/2</sub> photoemission regions for **ZnP-GNP** are reported (Fe is not present in the compound).

The two N 1s distinct components shown in Figure S10a confirm the functionalization of the Zinc 2-[(4'-formyl)phenyl]ethynyl-5,10,15,20-tetraphenylporphyrin on graphene surface. The first peak was attributed to porphyrin nitrogens (399.4 eV) and the second to substituted amine group (402.4 eV) with a 4.0 atomic ratio of the first to the second component. In Figure S10b the Zn 2p<sub>3/2,1/2</sub> component shows a peak at 1022.4 eV, confirming the insertion of the zinc in the macrocycle.

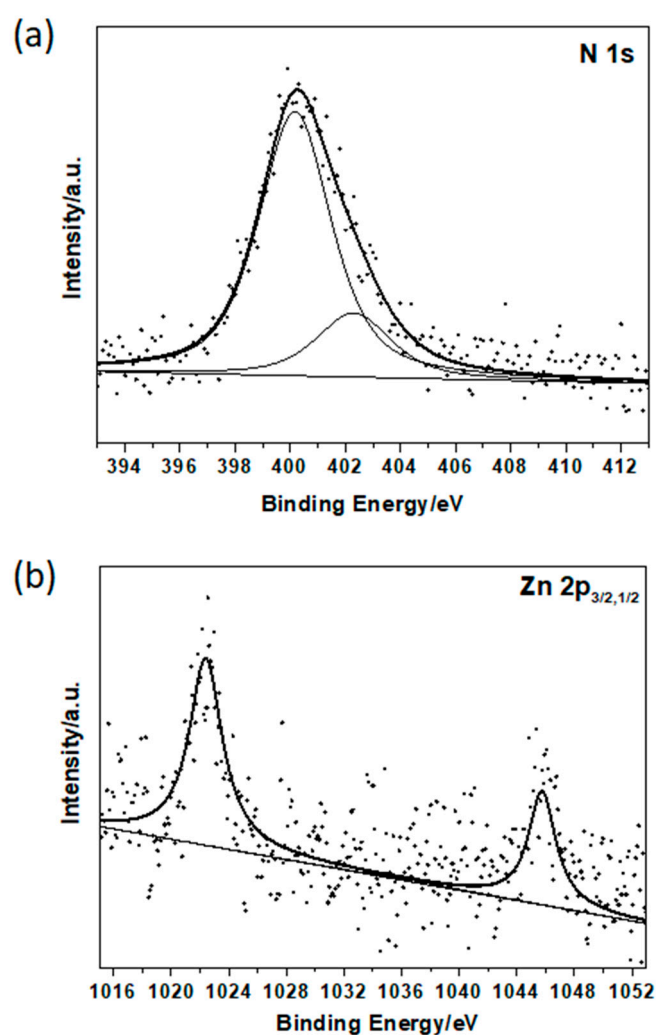

**Figure S12.** (a) N 1s and (b) Zn 2p<sub>3/2,1/2</sub> photoemission regions of **ZnP-GNP**. Experimental curve (dots) and peak-fit components (lines) are shown together

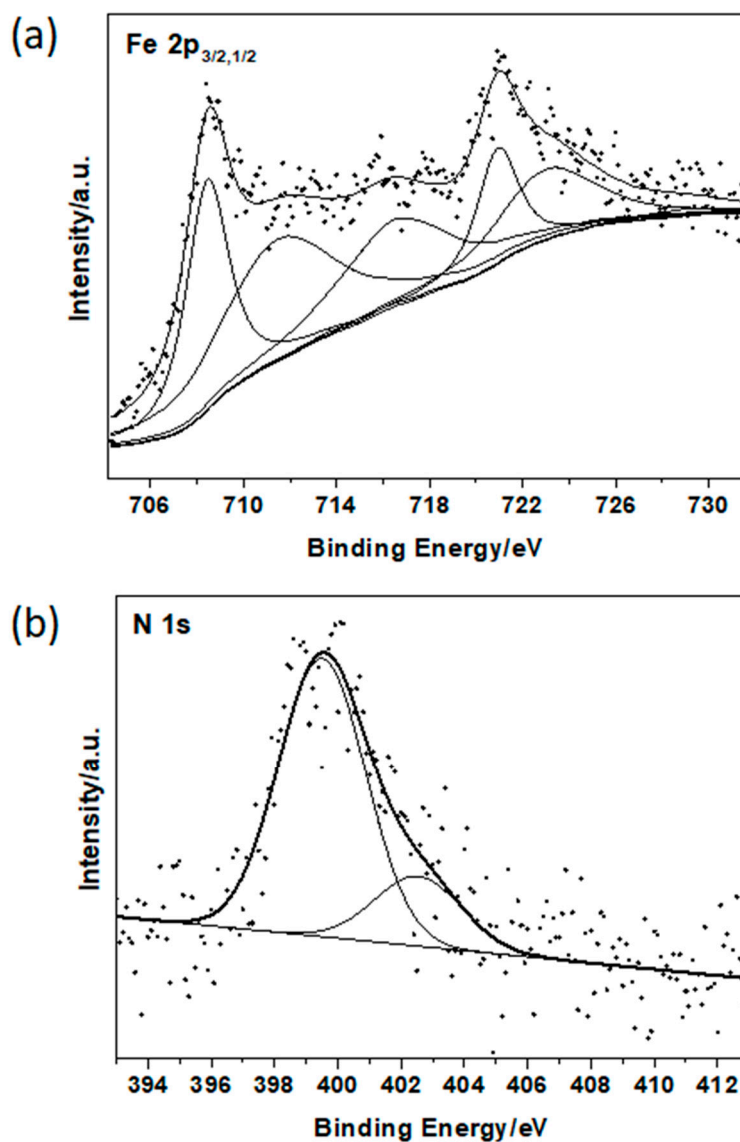

**Figure S13.** (a) Fe 2p<sub>3/2,1/2</sub> and (b) N 1s photoemission regions of Fc-ZnP-GNP. Experimental curve (dots) and peak-fit components (lines) are shown together.

## Raman spectroscopy

Compound *Fc-ZnP-GNP*

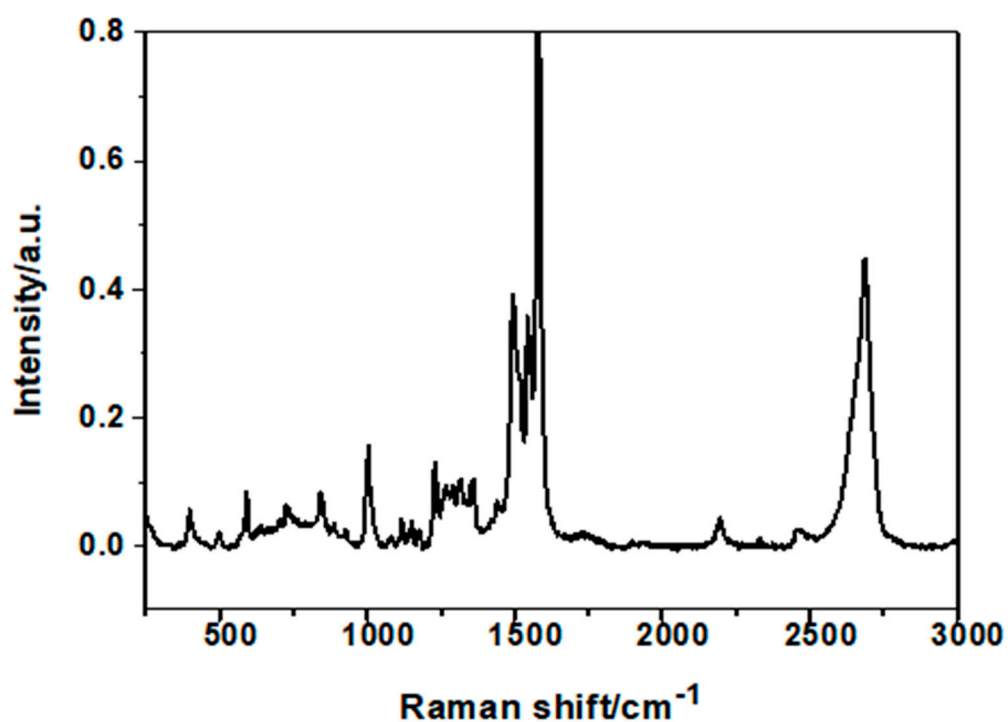

Figure S14. Raman spectrum using a 600 l/mm grating in the spectral range 200 - 3000  $\text{cm}^{-1}$  of *Fc-ZnP-GNP*

## UV-Vis spectroscopy

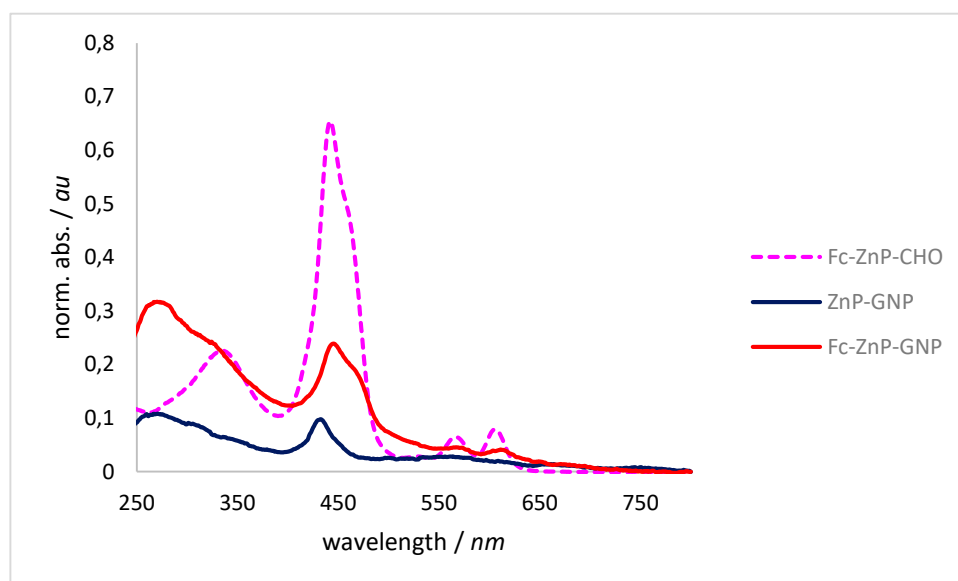

Figure S15. Comparison of the normalized UV-Vis spectra of *Fc-ZnP-CHO*, *ZnP-GNP* and *Fc-ZnP-GNP* in  $\text{CH}_2\text{Cl}_2$

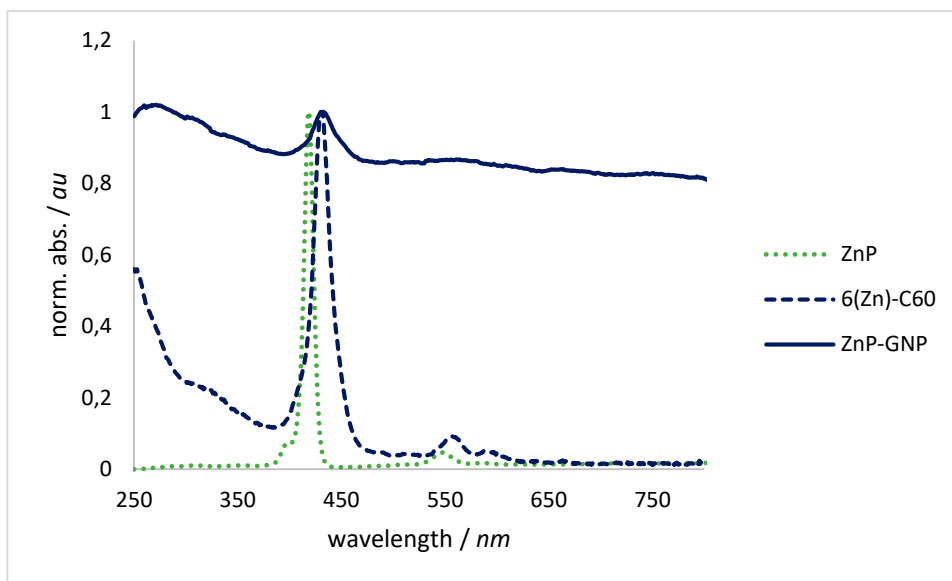

**Figure S16.** Comparison of the normalized UV-Vis spectra of ZnP, 6(Zn)-C60 and ZnP-GNP in  $\text{CH}_2\text{Cl}_2$

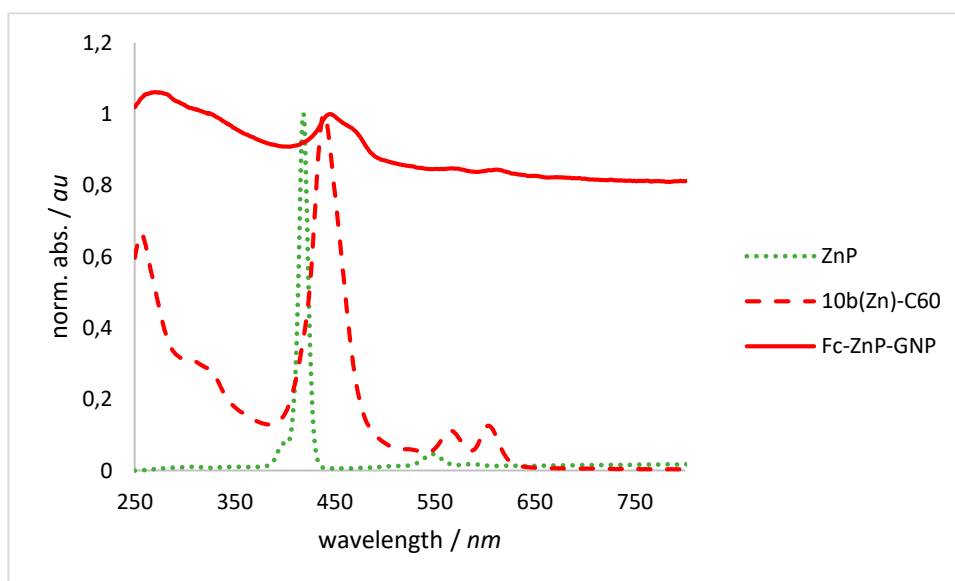

**Figure S17.** Comparison of the normalized UV-Vis spectra of ZnP, 10b(Zn)-C60 and Fc-ZnP-GNP in  $\text{CH}_2\text{Cl}_2$

## DFT theoretical calculations

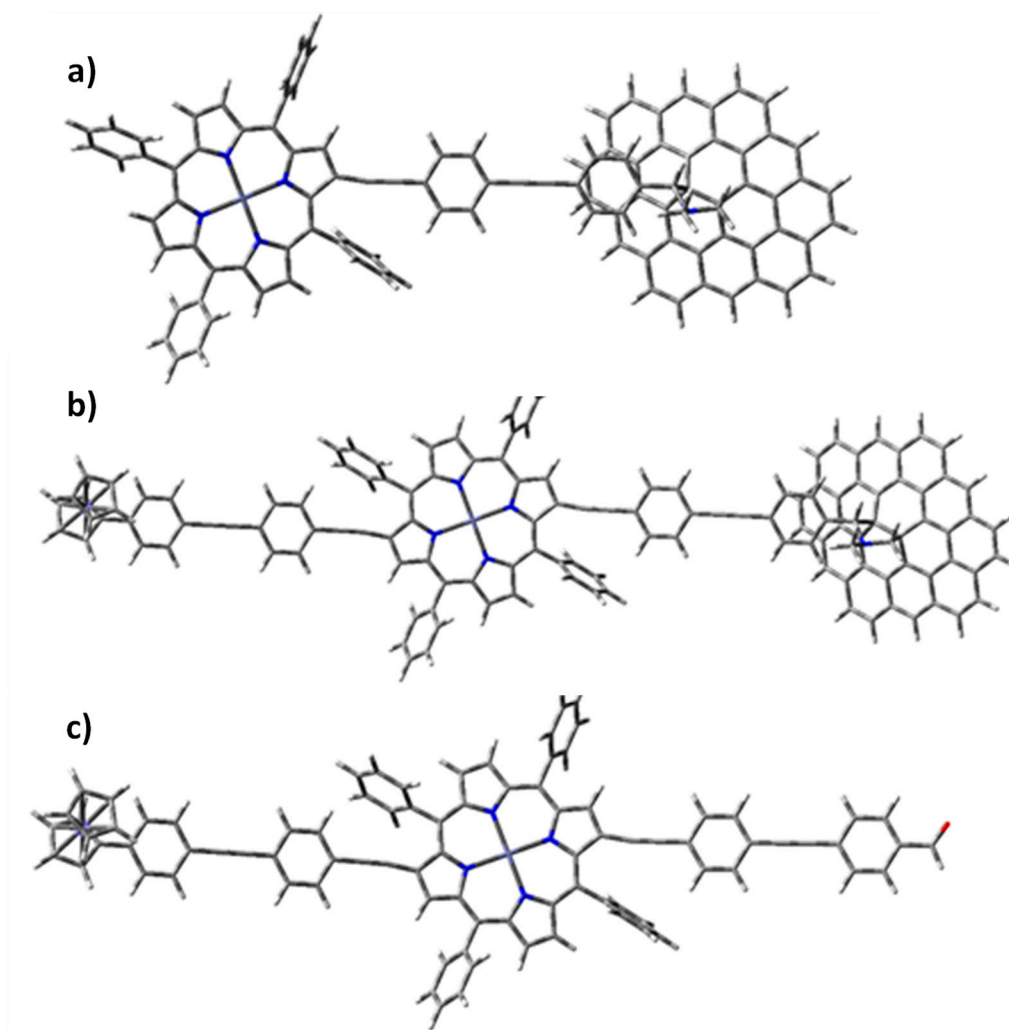

**Figure S18.** PBE0/6-311G(d) optimized structures of a) ZnP-GNP, b) Fc-ZnP-GNP and c) Fc-ZnP-CHO.

**Table S1.** Calculated spherical averages of the responses for the investigated compounds

| Compound   | $\mu$<br>(D) | $\langle\beta_{  }\rangle$<br>( $\times 10^{-30}$ esu) | $\mu\langle\beta_{  }\rangle/5kT$<br>( $\times 10^{-36}$ esu) | $\gamma_{  }$<br>( $\times 10^{-36}$ esu) | % of dipolar <i>vs</i> cubic contribution |
|------------|--------------|--------------------------------------------------------|---------------------------------------------------------------|-------------------------------------------|-------------------------------------------|
| ZnP-GNP    | 1.23         | 26                                                     | 155                                                           | -1890                                     | 8.2                                       |
| Fc-ZnP-GNP | 1.17         | 20                                                     | 114                                                           | -4388                                     | 2.6                                       |
| Fc-ZnP-CHO | 5.31         | 103                                                    | 2659                                                          | -5484                                     | 48                                        |
